# ImmunoPET as Stoichiometric Sensor for Glypican-3 in Models of Hepatocellular Carcinoma

Olivia J. Kelada Ph.D.,<sup>1,2</sup> Nicholas T. Gutsche B.S.,<sup>1</sup> Meghan Bell B.S.,<sup>1</sup> Rose M. Berman B.A.,<sup>1</sup> Kwamena E. Baidoo Ph.D., Blake M. Warner D.D.S., Ph.D.,<sup>3</sup> Lawrence P. Szajek Ph.D.,<sup>4</sup> Jessica Hong,<sup>5</sup> Mitchell Ho Ph.D.,<sup>5</sup> Peter L. Choyke M.D.,<sup>1</sup> Freddy E. Escorcia M.D., Ph.D.<sup>1,6,\*</sup>

**Background:** Hepatocellular carcinoma (HCC) is the fifth most common cancer worldwide. While conventional imaging approaches like ultrasound, CT, and MRI play critical roles in the diagnosis and surveillance of HCC, improved methods for detection and assessment of treatment response are needed. One promising approach is the use of radiolabeled antibodies for positron emission tomography (immunoPET) imaging. Glypican-3 (GPC3) is a proteoglycan that is highly expressed in the majority of HCC tumors. GPC3-specific antibodies are used to diagnose HCC histopathologically, and have been proposed as a treatment of HCC. Here, we design, synthesize and demonstrate that our humanized immunoPET agent, [<sup>89</sup>Zr]Zr-DFO-TAB-H14, can stoichiometrically bind to models of human liver cancer with varied GPC3 expression. **Methods:** The GPC3-specific monoclonal humanized IgG1, TAB-H14, was used as a scaffold for engineering our immunoPET agent. Fluorescent and deferoxamine (DFO) chelate conjugates of TAB-H14 were characterized using mass spectrometry. Binding affinity of TAB-H14 and conjugates for GPC3 was determined in cell-free biolayer interferometry, and cell-based radioimmunoassays. GPC3-expression was assessed by flow cytometry and immunofluorescence using commercially available anti-GPC3 antibodies and TAB-H14 in GPC3<sup>-</sup> (A431) and GPC3<sup>+</sup> cell lines including an engineered line (A431-GPC3<sup>+</sup>, G1) and liver cancer lines (HepG2, Hep3B, and Huh7). DFO-TAB-H14, was radiolabeled with Zr-89. Mice were subcutaneously engrafted with the aforementioned cell lines and *in vivo* target engagement of the immunoPET agent [<sup>89</sup>Zr]Zr-DFO-TAB-H14 was determined using PET/CT, quantitative biodistribution, and autoradiography. **Results:** TAB-H14 demonstrated subnanomolar to nanomolar affinity for human GPC3. Fluorescently tagged TAB-H14 was able to bind to GPC3 on cell membranes of GPC3-expressing lines by flow cytometry. These results were confirmed by immunofluorescence staining of A431, G1 HepG2, Hep3B, and Huh7 tumor sections. ImmunoPET imaging with [<sup>89</sup>Zr]Zr-DFO-TAB-H14 showed stoichiometric tumor uptake corresponding to the cell surface expression levels. Autoradiography and immunostaining confirmed *in vivo* findings. **Conclusion:** We systematically demonstrate that the humanized immunoPET agent [<sup>89</sup>Zr]Zr-DFO-TAB-H14 specifically and stoichiometrically binds to GPC3 in several models of human liver cancer, serving as a promising *in vivo* GPC3 sensor. This agent may provide utility in HCC diagnosis and surveillance, and the selection of candidates for GPC3-directed therapies.

## INTRODUCTION

Hepatocellular carcinoma (HCC) is the fifth most prevalent malignancy and the second leading cause of cancer-related deaths worldwide (1). In the U.S., an estimated 40,000 new cases of HCC are diagnosed every year, with an average 5-year survival of 18.4%. Moreover, both the incidence and death rates of primary liver cancers in the U.S. are projected to increase in coming years (2).

Diagnosis of liver cancer, especially in high-risk patients with known hepatitis B and/or C and cirrhosis, typically involves evaluation of serum biomarkers (e.g. alpha-fetoprotein and/or carcinoembryonic antigen, liver function tests), as well as imaging techniques such as ultrasound (US), computed tomography (CT), and magnetic resonance imaging (MRI) (3, 4). The aforementioned modalities can help inform diagnosis

and disease progression, however, offer limited functional information about tumors. While [<sup>18</sup>F]-fluorodeoxyglucose [FDG] positron emission tomography (PET) is useful in multiple tumor types, in HCC it is not used because FDG is only taken up by 50-60% of HCC (5). Accordingly, tumor-selective PET imaging agents could be quite valuable in HCC.

Radiolabeled tumor antigen-selective antibodies have been developed as immunoPET theranostic agents and have demonstrated success in preclinical (6-11) and clinical studies (12-18). Conventionally, given the 3-7 day blood half-life of most full length antibodies (19), radioisotopes with corresponding physical half-lives such as Zr-89 (3.5 days) or I-124 (4.2 days) are utilized for antibody labeling.

Glypican-3 (GPC3) is a heparan sulfate proteoglycan that plays an important role in cell growth, differentiation,

<sup>1</sup>Molecular Imaging Program, National Cancer Institute, National Institutes of Health, Bethesda, MD. <sup>2</sup>In vivo Imaging, Discovery and Analytics, PerkinElmer Inc., Hopkinton, MA. <sup>3</sup>National Institute of Dental and Craniofacial Research, National Institutes of Health, Bethesda, MD. <sup>4</sup>PET Department, Clinical Center, National Institutes of Health, Bethesda, MD. <sup>5</sup>Laboratory of Molecular Biology, National Cancer Institute, National Institutes of Health, Bethesda, MD. <sup>6</sup>Radiation Oncology Branch, National Cancer Institute, National Institutes of Health, Bethesda, MD. \*To whom correspondence should be addressed. Email: [freddy.escorcia@nih.gov](mailto:freddy.escorcia@nih.gov)

## ARTICLES PREPRINT

and migration (20). GPC3 is overexpressed in up to 80% of HCC tumors, has a 72% specificity for HCC based on immunohistochemistry (21), and its expression has been correlated with poor prognosis (22). Importantly, GPC3 is absent in normal tissues except testis and placenta, cirrhotic liver, and benign lesions, making it an ideal HCC-selective target (21, 23-25). GPC3-derived peptide vaccines, antibodies and their fragments targeting GPC3 have shown promising biological activity and target engagement *in vivo*, further underscoring the utility of GPC3 as a valuable target in HCC. However, most studies have used murine antibodies, limiting the potential for human translation (26-30).

TAB-H14 is a full-length humanized IgG1 antibody with specificity to GPC3. Using TAB-H14 as a scaffold, we report the design, engineering and characterization of a novel liver cancer-directed immunoPET probe, and confirm its target engagement in several models of human liver cancer.

## MATERIALS & METHODS

### Cell culture

Cell lines include a GPC3<sup>+</sup> human epidermoid carcinoma (A431), transfected A431-GPC3<sup>+</sup> (G1) (31), as well as GPC3<sup>+</sup> human hepatoblastoma (HepG2), human hepatocellular carcinoma (Hep3B), which were obtained from ATCC (Manassas, VA). A well-differentiated human hepatocellular carcinoma, Huh7 (GPC3<sup>low</sup>), was obtained from Sekisui Xenotech (Kansas City, KS). DMEM (Life Technologies, Carlsbad, CA) supplemented with 10% FetalPlex (Gemini Bio-Products, West Sacramento, CA) was used to culture all cell lines. All cell lines tested negative for mycoplasma in monthly tests and were used for experiments within 15 passages.

### Antibodies

TAB-H14, humanized anti-GPC3 IgG1, was purchased from Creative Biolabs (Shirley, NY) and Rituximab (Biogen Inc. Cambridge, MA), a full length chimeric IgG1 antibody with a human Fc portion identical to TAB-H14, was used as an IgG1 isotype control.

### Preparation and characterization of TAB-H14 Alexa Fluor 488 conjugates

TAB-H14 solution (1 mg/mL; 2 mL) was buffer exchanged into PBS (pH 8.0) and spun down (4500 RPM for 50 min at 25 °C) to a concentration of 15 mg/mL using 30,000 MWCO Amicon Ultra Centrifugal Filter (EMD Millipore, Burlington, MA). The buffer exchanged TAB-H14, (1 mg, 0.067 mL, 6.75 nmol) was transferred to a 1.5 mL Eppendorf tube and the pH was adjusted to 8.5-8.8 with a solution of Na<sub>2</sub>CO<sub>3</sub> (0.1 M). A solution of Alexa Fluor 488 NHS Ester (Invitrogen, Carlsbad, CA) in DMSO (32.5 µL, 3.12 mM; in 15:1 molar excess to TAB-H14) was pipetted dropwise into the Eppendorf vial over 3 min with intermittent gentle vortexing. To this mixture, a solution of PBS (120 µL, pH 8.8) was added. The mixture was placed on a thermomixer (Eppendorf, Hamburg, Germany) and shaken at 37°C for 1 h. After incubation, unbound Alexa

Fluor 488 NHS Ester was removed with a PD-10 desalting column (GE Healthcare, Piscataway, NJ) using NH<sub>4</sub>OAc buffer (0.15 M, pH 7) as eluent.

An IgG1 formulation solution (10 mg/mL; 2 mL) was buffer exchanged into NaHCO<sub>3</sub> (0.1 M, pH 9.0) and spun down to a concentration of 20 mg/mL. The buffer exchanged IgG1 (1 mg, 0.05 mL, 6.8 nM) was transferred to a 1.5 mL Eppendorf tube. To this solution NaHCO<sub>3</sub> buffer (400 µL, 0.1 M, pH 8.8) was added in order to modulate the volume percentage of DMSO in the reaction. Alexa Fluor 488 NHS Ester (111.7 µL, 3.12 mM; 50:1 molar excess over IgG1) was pipetted dropwise into the Eppendorf vial over 5 min with intermittent gentle vortexing. The tube containing the mixture was covered with aluminum foil, placed on a thermomixer, and shaken at 37°C for 2 h in the dark. After incubation, unbound Alexa Fluor 488 NHS Ester was removed with a PD-10 desalting column using NH<sub>4</sub>OAc buffer (0.15 M, pH 7) as eluent.

### Flow cytometry

A431, G1, HepG2, Hep3B and Huh7 cell lines were harvested, washed once and resuspended in 60 µL of ice-cold 1% BSA (Sigma-Aldrich, St. Louis, MO) in PBS. To minimize nonspecific staining, cell suspensions were incubated for 15 minutes on ice with human FcR block (Miltenyi Biotec, Bergisch Gladbach, Germany). 1 x 10<sup>6</sup> cells were then distributed into control and experimental groups. Unstained and single-color samples were used as controls, and experimental samples were stained with a 30 nM concentration of either commercially available anti-human GPC3 Phycoerythrin (PE)-conjugated mouse antibody (R&D Systems, Inc. Minneapolis, MN) or TAB-H14 antibody conjugated to Alexa Fluor 488 (AF-488, Invitrogen, Carlsbad, CA). Cells were stained with 7-Amino Actinomycin D viability staining solution (7-AAD, BioLegend, San Diego, CA). The suspensions were incubated for 45 min on ice in the dark. Data were collected using a BD FACSCalibur cytometer running BD CellQuest Pro software (v6.0), and results were analyzed with FlowJo (v10.4.2).

### Bio-layer interferometry for TAB-H14

Previously described methods were used to perform Bio-layer interferometry for TAB-H14 (32). Briefly, biotinylated human GPC3 protein (Acro Biosystems, Newark, DE) was diluted to 5 µg/mL in assay buffer: 1X PBS with 0.1% acetylated BSA (Electron Microscopy Sciences, Hatfield, PA) in a 96-well plate and loaded onto streptavidin biosensors (FortéBio, Menlo Park, CA). Unlabeled TAB-H14 was diluted in assay buffer at 7 concentrations from 0-16 nM and loaded into a 96-well plate (final volume of 200 µL). GPC3 was loaded to a density of 0.3 to avoid avidity effects. Plates were run on an Octet Red96 system (FortéBio, Menlo Park, CA) and analyzed with FortéBio Octet Data Analysis software (v.11).

### Murine subcutaneous xenograft models

All procedures were approved by the Institutional Animal Care and Use Committee at the National Institutes of Health under protocol ROB-105. Female athymic homozygous nu/

nu mice (NCI Athymic NCr-nu/nu strain 553, Charles River Laboratories, Wilmington, MA), between 4-6 weeks old, were subcutaneously engrafted with  $1.0 \times 10^6$ ,  $2.5 \times 10^6$ ,  $8.0 \times 10^6$ ,  $9.5 \times 10^6$  or  $5.0 \times 10^6$  cells for A431, G1, HepG2, Hep3B or Huh7, respectively. HepG2, Hep3B or Huh7 cells were suspended in 200  $\mu$ L of a solution containing a 1:1 mixture of Matrigel (Corning, Corning, NY) and cell culture medium prior to engraftment. A431 and G1 cells were suspended in 200  $\mu$ L cell culture media prior to engraftment. Tumors were grown to a size of approximately 100-200 mm<sup>3</sup>.

### Preparation and characterization of TAB-H14 radioconjugates

TAB-H14 solution (1 mg/mL; 2 mL) was buffer exchanged into PBS (pH 8.0) and spun down (4500 RPM for 50 min at 25 °C) to a concentration of 15 mg/mL using 30,000 MWCO Amicon Ultra Centrifugal Filter (EMD Millipore, Burlington, MA). The buffer exchanged TAB-H14, (2 mg, 0.133 mL, 13.5 nM) was transferred to a 1.5 mL Eppendorf tube and the pH was adjusted to 8.9-9.1 with a solution of Na<sub>2</sub>CO<sub>3</sub> (0.1 M). A solution of DFO-Bz-NCS (Macrocyclics Inc, Plano, TX) in DMSO (7.6  $\mu$ L, 203 nM; 15:1 molar excess of TAB-H14) was pipetted dropwise into the Eppendorf vial over 3 min with intermittent gentle vortexing. To this mixture, a solution of PBS (60  $\mu$ L, pH 9) was added. The mixture was placed on a thermomixer (Eppendorf, Hamburg, Germany) and shaken at 37°C for 1 h. After incubation, unbound DFO-Bz-NCS was removed with a PD-10 desalting column (GE Healthcare, Piscataway, NJ) using NH<sub>4</sub>OAc buffer (0.15 M, pH 7) as

eluate and concentrated in a 30,000 MWCO Amicon Ultra centrifugal filter column as described above.

An IgG1 formulation solution (10 mg/mL; 2 mL) was buffer exchanged into NaHCO<sub>3</sub> (0.1 M, pH 9.0) and spun down to a concentration of 20 mg/mL. The buffer exchanged IgG1 (2 mg, 0.1 mL, 13.6 nM) was transferred to a 1.5 mL Eppendorf tube and the pH was adjusted to 9.2 with Na<sub>2</sub>CO<sub>3</sub> (0.1 M). DFO-Bz-NCS in DMSO (25.6  $\mu$ L, 680 nM; 50:1 molar excess over IgG1) was pipetted dropwise into the Eppendorf vial over 3 min with intermittent gentle vortexing. To this solution NaHCO<sub>3</sub> buffer (195  $\mu$ L, 0.1 M, pH 9) was added in order to modulate the volume percentage of DMSO in the reaction to ensure it was <10%. The mixture was placed on a thermomixer and shaken at 37°C for 2 h. After incubation, unbound DFO-Bz-NCS was removed with a PD-10 desalting column using NH<sub>4</sub>OAc buffer (0.15 M, pH 7) as eluate and concentrated in a 30,000 MWCO Amicon Ultra-4 Centrifugal Filter column as described above.

Mass spectrometry via an Exactive Plus Extended Mass Range benchtop Orbitrap system with heated electrospray ionization source (HESI) was used to determine the number of DFO chelators coupled per antibody as previously described (11).

For radiolabeling, ascorbic acid (20  $\mu$ L, 0.1 M) was added to a solution of Zr-89 (370-800 MBq, Cyclotron NIH Clinical Center, Bethesda, MD or 3D Imaging, Little Rock AK) in oxalic acid solution (25  $\mu$ L, 1 M). The mixture was neutralized to pH 7-7.5 by addition of HEPES buffer (65  $\mu$ L, 0.5 M) and Na<sub>2</sub>CO<sub>3</sub> (12.5  $\mu$ L, 2 M). This stock solution was

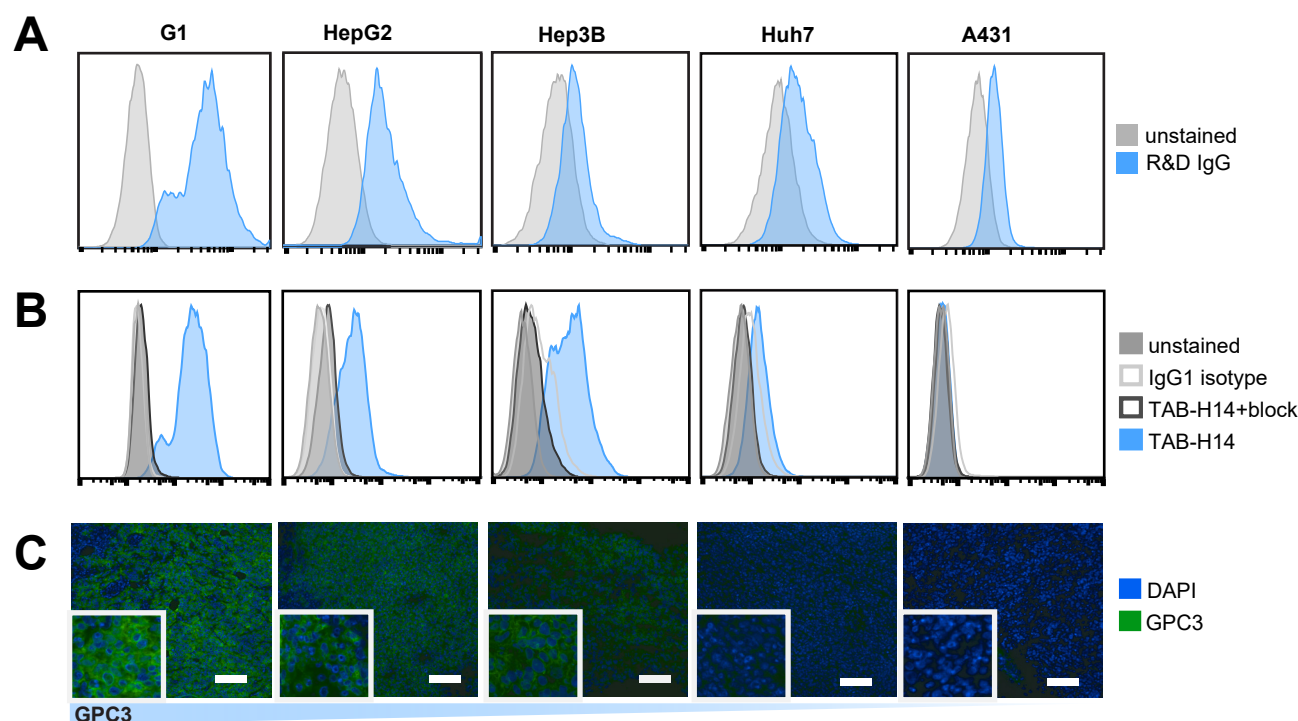

**Figure 1: TAB-H14 specifically binds to GPC3 positive cells and tumor tissues.** Flow cytometry assessment of each cell line shows differential binding proportional to GPC3 copies per cell incubated with either (A) commercial R&D monoclonal anti-GPC3 IgG2A-Phycoerythrin, or (B) TAB-H14-AF488. TAB-H14-AF488 performance was also compared to IgG1 isotype control, cells blocked with 1000-fold excess of unlabeled TAB-H14, and unstained cells. (C) Immunofluorescence images of cells stained with TAB-H14-AF488 (green) and DAPI (blue). Scale bar represents 100  $\mu$ m. Insert edge measures 50  $\mu$ m.



## ARTICLES PREPRINT

**Figure 2: ImmunoPET tracer engages GPC3 in vivo and quantitates its expression.**

**(A)** Representative PET/CT images acquired at 72h post injection (p.i.) of [ $^{89}\text{Zr}$ ]Zr-DFO-TAB-H14 of athymic mice subcutaneously engrafted with G1, HepG2, Hep3B, Huh7, and A431 cell lines (n=5 per group), illustrating tracer avidity proportional to known GPC3 cell membrane copy number (PET SUV scale 0-10). **(B)** PET re-scaled to SUV 0-3 for detection of cell lines expressing low levels of GPC3. **(C)** and **(D)** Quantitative image analysis confirms GPC3 engagement within tumors by tracer as early as 24h p.i. persisting through at least 144h p.i.. \*, \*\*, \*\*\* denote  $p \leq 0.05$ ,  $p \leq 0.01$ , and  $p \leq 0.005$ , respectively, and reflects comparisons between TAB-H14 signal versus IgG1 signal at the same timepoints.

**A**

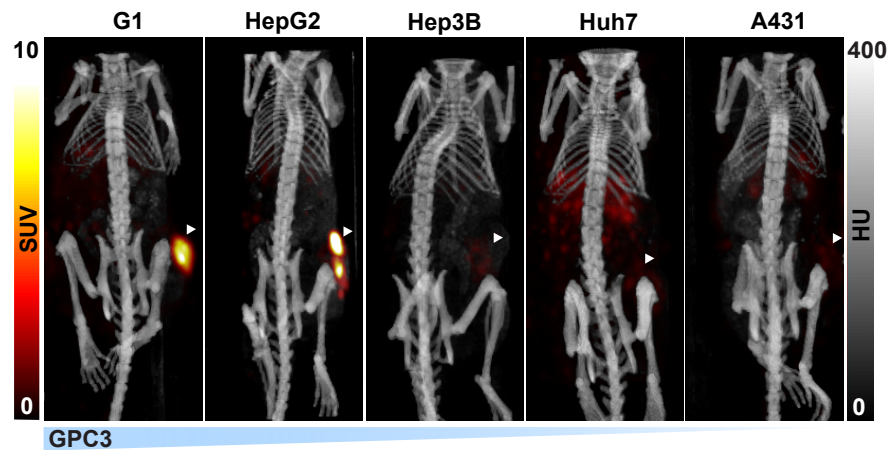

**B**

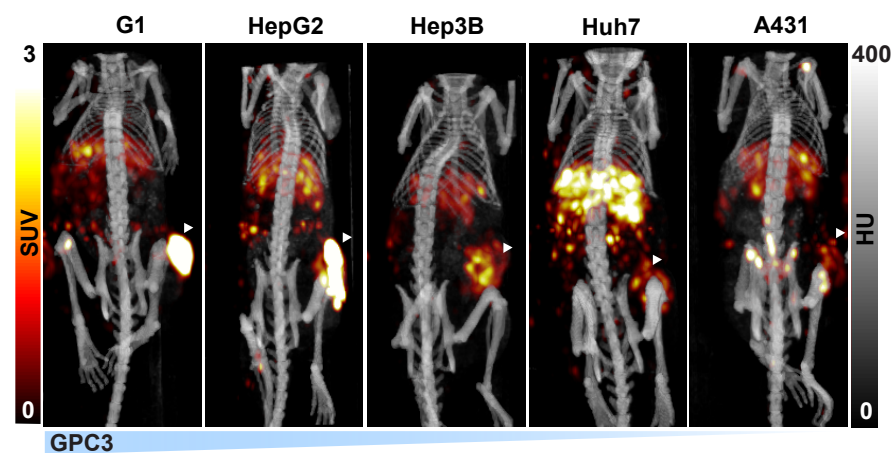

**C**

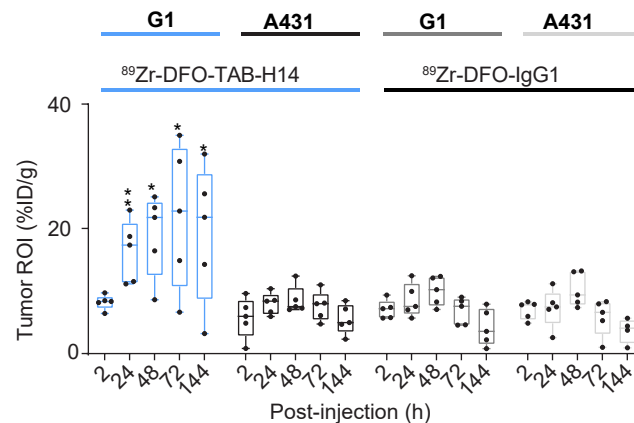

**D**

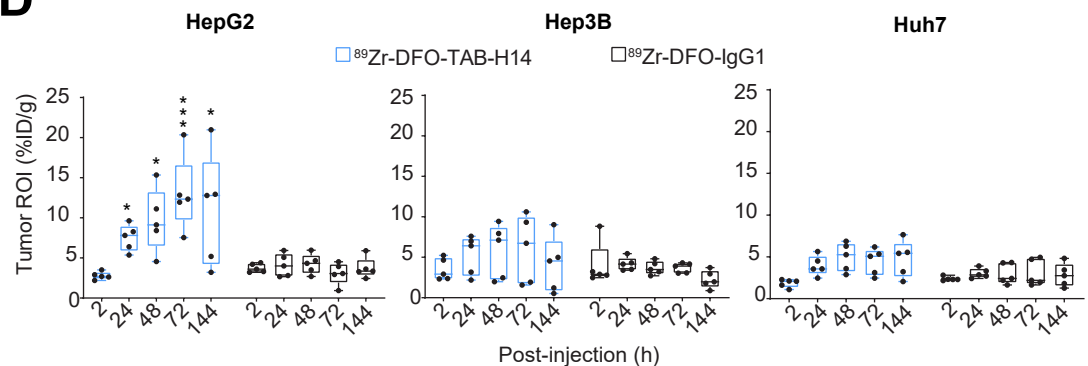

## ARTICLES PREPRINT

portioned between DFO-IgG1 or DFO-TAB-H14 (0.4 mg) in ammonium acetate buffer (0.15 M). The reaction mixture was incubated at 37°C with gentle agitation for 1 h. The reaction was quenched by the addition of ethylenediaminetetraacetic acid solution (5  $\mu$ L, 0.1 M). The radiolabeled product was purified in PBS using a PD-10 desalting column with PBS as eluate.

### Serum stability

To assess the stability of the purified [ $^{89}\text{Zr}$ ]Zr-DFO-TAB-H14 radioconjugate was incubated at 37 °C in PBS or human serum. At several timepoints following incubation, aliquots were taken and run on radio-iTLC with silica-gel impregnated glass-microfiber paper strips (iTLC-SG, Varian, Lake Forest, CA), using a mobile phase of aqueous solution of EDTA (50 mM, pH 5.5), and analyzed using an AR-2000 (Bioscan Inc., Washington, DC). Percent of total activity at the origin versus total activity was used to determine the intact radioconjugate.

### Radioimmunoassay

Saturation and competition binding studies were performed to determine the  $K_D$  and  $IC_{50}$  of [ $^{89}\text{Zr}$ ]Zr-DFO-TAB-H14 using the GPC3<sup>+</sup> HepG2 cell line. For the competition assay, cells were plated (25,000 cells/well using 12-well plates, 1 day prior to the assay) and varying concentrations of [ $^{89}\text{Zr}$ ]Zr-DFO-TAB-H14 were introduced to corresponding wells; non-specific binding was determined by adding unlabeled TAB-H14 (600 nM, 23-fold mass excess of highest concentration used) to another set of duplicates. For the competition assay, 1 nM [ $^{89}\text{Zr}$ ]Zr-DFO-TAB-H14 was used and the concentration of unlabeled TAB-H14 was varied. After incubation (1.5 h, 37 °C), the bound [ $^{89}\text{Zr}$ ]Zr-DFO-TAB-H14 was separated from the free as plated cells were washed with phosphate buffered saline (PBS), treated with trypsin, and collected in vials. The bound radioactivity for these samples was determined by measuring gamma radiation (Perkin Elmer 2480 Wizard<sup>3</sup>, Shelton, CT). From the saturation studies, the  $K_D$  was determined from eight concentrations of [ $^{89}\text{Zr}$ ]Zr-DFO-TAB-H14. Specific binding was calculated by subtracting non-specific binding from total binding and analyzed using non-linear regression curve fitting (one-site specific binding), PRISM (v 7.0, GraphPad Software, San Diego, CA, USA).

### PET/CT imaging

For experiments with the TAB-H14 subcutaneous xenograft model, mice were administered ( $80 \pm 5$   $\mu$ Ci; 3.145 MBq) of either [ $^{89}\text{Zr}$ ]Zr-DFO-TAB-H14 or [ $^{89}\text{Zr}$ ]Zr-DFO-IgG1 via intravenous injection. Each animal was anesthetized with isoflurane (2.5% for induction, 1.5-2% for maintenance on a heated imaging bed for PET scanning static 10-20 min PET scans (BioPET/CT, Sedecal, Madrid, Spain) were obtained at 2, 24, 48, 72 and 144h post injection. A whole-body CT was obtained immediately after the PET acquisition. CT scans (8.5 min, 50 kV, 180 uA) and were acquired to provide attenuation correction and anatomical coregistration of PET scans. The PET data were reconstructed using a 3D OSEM algorithm. Normalization, decay-correction, attenuation-

correction and dead time-correction were applied to all PET data acquired in listmode. Reconstructed PET and CT data were quantitatively evaluated using MIMVista software (MIM Software Inc. Cleveland, OH) and VivoQuant Software (InviCRO, Boston, MA). Regions of interest (ROIs) were drawn on the CT images in all planes (coronal, sagittal and transverse). The radioactivity uptake values within CT-drawn organs were obtained from mean voxel values within the ROI and converted to percentage injected dose (ID) and then divided by mouse weight (g) to obtain an ROI-derived percentage of the injected radioactive dose per gram of tissue (%ID/g).

### Blood pharmacokinetics and biodistribution

Non-tumor-bearing athymic nu/nu mice (n=3) were injected with [ $^{89}\text{Zr}$ ]Zr-DFO-TAB-H14 ( $52 \pm 2.05$   $\mu$ Ci; 1.85 MBq in 200  $\mu$ L PBS) to assess its pharmacokinetic profile. Blood samples (5  $\mu$ L) were collected in heparinized capillary tubes (Corning, NY), and the radioactivity measured in a  $\gamma$ -scintillation counter. Counts were plotted in Graphpad Prism a one-phase exponential decay model was used to determine the blood half-life.

The biodistribution of [ $^{89}\text{Zr}$ ]Zr-DFO-TAB-H14 at 3.5, 24, 48, 72 and 144 h post injection was determined using the same G1 subcutaneous (right flank) model as used for PET imaging (female athymic, nude mice). Tumor volumes were measured prior to imaging using calipers, and the mice were separated into groups with similar mean tumor volumes (100-200 mm<sup>3</sup> before receiving radioconjugates ( $55 \pm 3.0$   $\mu$ Ci;  $2.04 \pm 0.1$  MBq) via intravenous injection. At 3.5, 24, 48, 72 and 144 h post-injection, mice (n=5, per time point) were euthanized. Twelve tissues including the tumor were collected. Each sample was weighed and measured in the gamma counter calibrated for Zr-89. The counts from each sample were decay- and background-corrected, and counts were converted into activity using a calibration curve generated from Zr-89 standards of known activity. The percent injected dose per gram (% ID/g) was calculated by normalizing data to the total activity injected into the corresponding animal.

### Tissue preparation, immunofluorescence and autoradiography, immunohistochemistry and staining

Tumors of euthanized animals were excised and immediately rinsed in PBS, weighed, and counted in the gamma-counter, submerged in molds containing TissueTek OCT medium (Sakura Finetek Inc, Torrance CA) and frozen on dry ice. Blocks were stored in -20°C until use. Consecutive 10  $\mu$ m sections were cut using the cryostat (Leica Biosystems, Buffalo Grove, IL, USA) from prepared frozen tissue blocks and placed on slides (Azer Scientific Inc., Morgantown, PA). Standards of Zr-89 ranging from 10nCi to 0.01 nCi (370 Bq to 0.37 Bq) were prepared for autoradiography exposure. Standards were pipetted at 5  $\mu$ L volume onto gel blot paper (Schleicher & Schuell, Keene, New Hampshire) and incubated with slides. Slides and standards were placed on an exposure cassette (GE HealthCare #63003544),

## ARTICLES PREPRINT

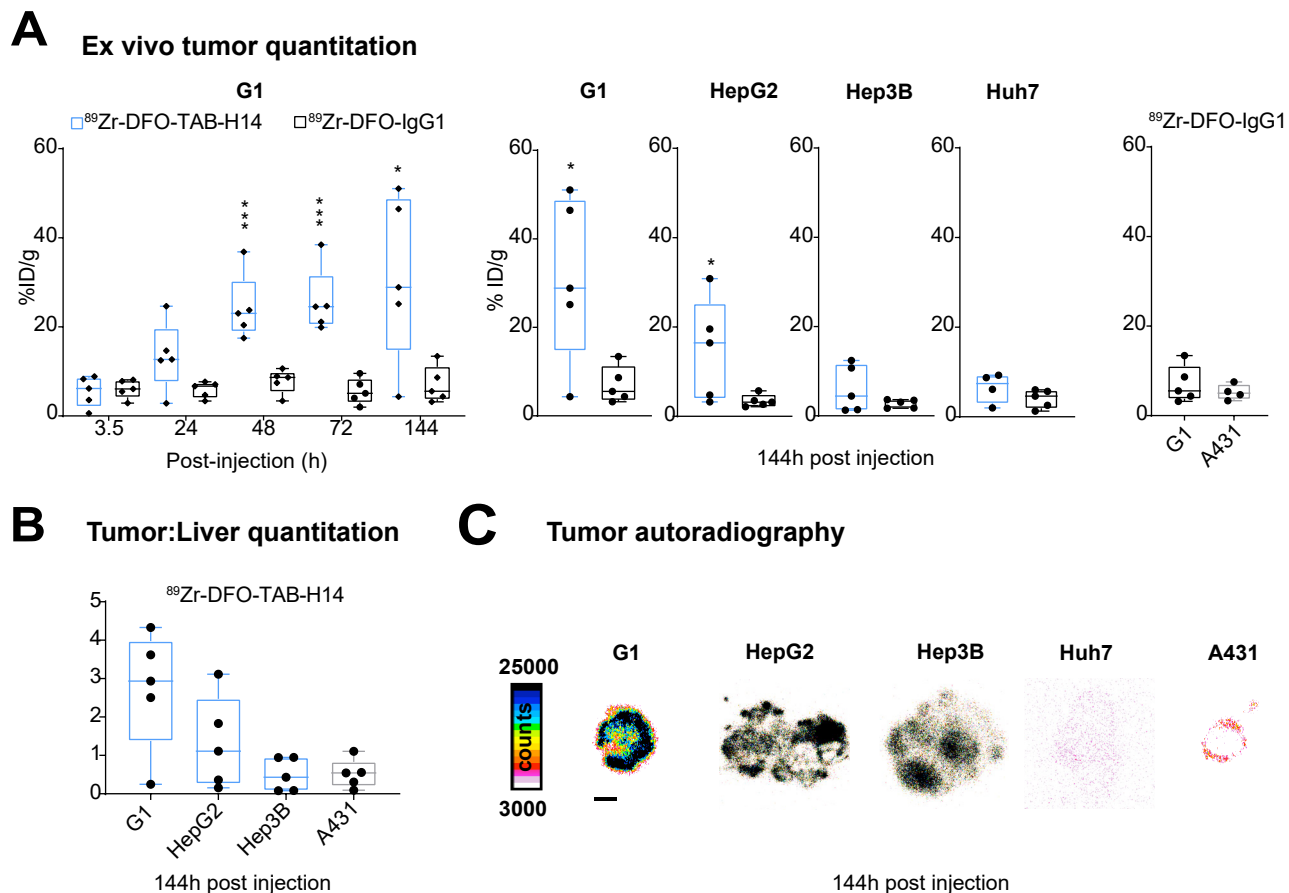

**Figure 3: Quantitative ex vivo biodistribution confirms denotation of tumor GPC3 expression by immunoPET tracer.** (A) G1 tumors harvested at several time points (n=5 per time point, per group) following injection of tracer exhibit highest percent injected dose per gram (%ID/g) value corresponding to its reported  $1.6 \times 10^6$  copies of GPC3 per cell, plateauing 48h post injection (p.i.) and persisting to at least 144h p.i.. (B) Quantitation of tumor-to-liver ratios, shows favorable values for G1 and HepG2, but equivocal values for other cell line-derived tumors. (C) Autoradiographic assessment of tumors. Scale bar represents 2mm. \*, \*\*, \*\*\* denote  $p \leq 0.05$ ,  $p \leq 0.01$ , and  $p \leq 0.005$ , respectively, and reflects comparisons between TAB-H14 signal versus IgG1 signal at the same timepoints.

covered with a plastic barrier, and left to expose onto a Phosphor Screen (GE HealthCare, #2895678) for 7 h. All qualitative autoradiography images were acquired at 240 h post injection (time includes seven hours exposure time in cassette). Samples were removed from exposure and the film was immediately read on the phosphorimager (GE typhoon, Uppsala, Sweden) at 25  $\mu$ m pixel resolution. Autoradiography files were converted to \*.tiff format and quantitatively analyzed using ImageJ software (ImageJ, Bethesda, MD) (33). Identical ROIs were applied for each known standard concentration to generate a linear standard curve of pixels per tissue region vs. concentration of Zr-89. ROIs were drawn around tissue regions, and the linear standard curve equation was applied to determine the amount of Zr-89 in each tissue section.

For immunofluorescence, tissue sections were incubated at room temperature to dry for 30 min and fixed in 100% methanol at  $-20^\circ\text{C}$  for 10 minutes, then left to air dry for 10 min, and rinsed in PBS. Blocking buffer was composed of 0.5% IgG-free BSA (Jackson Labs, Bar Harbor, ME), 2.2% glycine (Sigma-Aldrich, St. Louis, MO), 0.1% Tween-20 (Sigma-Aldrich), 5% donkey serum (Jackson Labs, Bar

Harbor, ME) solution in PBS. Slides were blocked with blocking buffer for 30 minutes at room temperature before being incubated with 10  $\mu\text{g/mL}$  of TAB-H14-AF488 antibody (diluted in blocking buffer) for 1 h at room temperature. Slides were subsequently rinsed in PBS and counterstained with 1:5000 dilution of DAPI (4',6-Diamidino-2-phenylindole dihydrochloride, Invitrogen, Eugene, OR) in deionized water for 3-5 min at room temperature. Slides were rinsed in deionized water, mounted with Fluoro-gel water-soluble mounting medium (Electron Microscopy Sciences, Hatfield, PA), and cover slips (Thermo Fisher, Portsmouth, NH) were placed. Stained slides were stored in the dark at  $4^\circ\text{C}$ .

### Statistical Analysis

Statistical analysis was performed using GraphPad Prism. Data are presented as mean values with standard deviation (SD). To determine whether there are any statistically significant differences between the means of two or more independent groups, the Student's t-test was used for paired data, and the one-way analysis of variance (ANOVA) was used when there was a minimum of three groups. Pearson's analysis was performed to determine correlation coefficient

**Table 1. Tracer Biodistribution in Tumors at 144 hours post injection**

| Tracer                                    | Cell Line (n=5) |             |             |             |             |
|-------------------------------------------|-----------------|-------------|-------------|-------------|-------------|
|                                           | G1              | HepG2       | Hep3B       | Huh7        | A431        |
| [ <sup>89</sup> Zr]Zr-DFO-TAB-H14 (%ID/g) | 31.2 ± 8.33     | 15.0 ± 5.08 | 6.04 ± 2.34 | 6.53 ± 1.70 | 5.67 ± 1.60 |
| [ <sup>89</sup> Zr]DFO-IgG1 (%ID/g)       | 7.03 ± 1.84     | 3.45 ± 0.61 | 2.73 ± 0.43 | 4.03 ± 0.92 | 5.23 ± 0.88 |
| Tumor-to-blood ratio (TAB-H14)            | 10.1 ± 2.54     | 14.2 ± 6.74 | 6.02 ± 1.73 | 2.77 ± 0.77 | 2.11 ± 0.79 |
| Tumor-to-liver ratio (TAB-H14)            | 2.73 ± 0.69     | 1.32 ± 0.54 | 0.50 ± 0.19 | 0.24 ± 0.08 | 0.52 ± 0.17 |

and statistical significance between GPC3 copy number and tracer signal in tumor tissues.

## RESULTS

### TAB-H14 binds specifically to GPC3 in liver cancer cell lines and in tumor tissue

To determine the binding affinity of TAB-H14 for human GPC3, we used cell-free and cell based binding studies. Bio-layer interferometry results demonstrated favorable kinetics ( $k_{on}$  and  $k_{off}$ ), and found  $K_D = 0.11 \pm 0.13$  nM for modified TAB-H14 (Figure S1A). Mass spectrometry evaluation of TAB-H14-AF488, TAB-H14-DFO confirmed a weighted average of 1.1 (range 0-3) AF488, and 4.3 (range 2-7) DFO per antibody, respectively (Figure S1B). IgG1 conjugates showed 0.72 (range 0-3) DFO and 8 AF488 per antibody (Figure S1E). Collectively, these data confirmed excellent specificity of TAB-H14 for GPC3 and that modifications with fluorescent or chelating moieties did not appreciably alter target binding.

Radiolabeling of both conjugates typically resulted in excellent radiochemical yields >80% and radiochemical purity >95%. Specific activity were also favorable for [<sup>89</sup>Zr]Zr-DFO-TAB-H14 and [<sup>89</sup>Zr]Zr-DFO-IgG1 with ranges of 13.0-13.7  $\mu$ Ci/ $\mu$ g (0.48-0.50 MBq/ $\mu$ g), and 11.6–12.4  $\mu$ Ci/ $\mu$ g (0.43-0.46 MBq/ $\mu$ g), respectively.

Competition and saturation binding radioimmunoassay with [<sup>89</sup>Zr]Zr-DFO-TAB-H14 and HepG2 cells showed  $IC_{50}$  of 0.48 nM (95% CI 0.02-0.85 nM) and 6.97 nM, respectively (Figure S1C).

Flow cytometry was used to assess cell membrane GPC3 availability in several cell lines. Both the commercial anti-GPC3 antibody and TAB-H14 bound best to the A431 cell line engineered to express  $1.6 \times 10^6$  copies of GPC3 on the cell membrane (G1). In contrast, HepG2, Hep3B, Huh7, which express  $3.2 \times 10^5$ ,  $2.5 \times 10^5$ , and  $9 \times 10^3$  copies of GPC3, respectively, demonstrate correspondingly lower binding by both antibodies (Figure 1A, B) (34). Immunofluorescence staining of tissue sections of fresh frozen tumors derived from the same cell lines engrafted in nu/nu athymic mice exhibited a similar pattern, that is, fluorescence intensity corresponding to expression of GPC3, generally localized to the cell membranes (Figure 1C).

ImmunoPET with [<sup>89</sup>Zr]Zr-DFO-TAB-H14

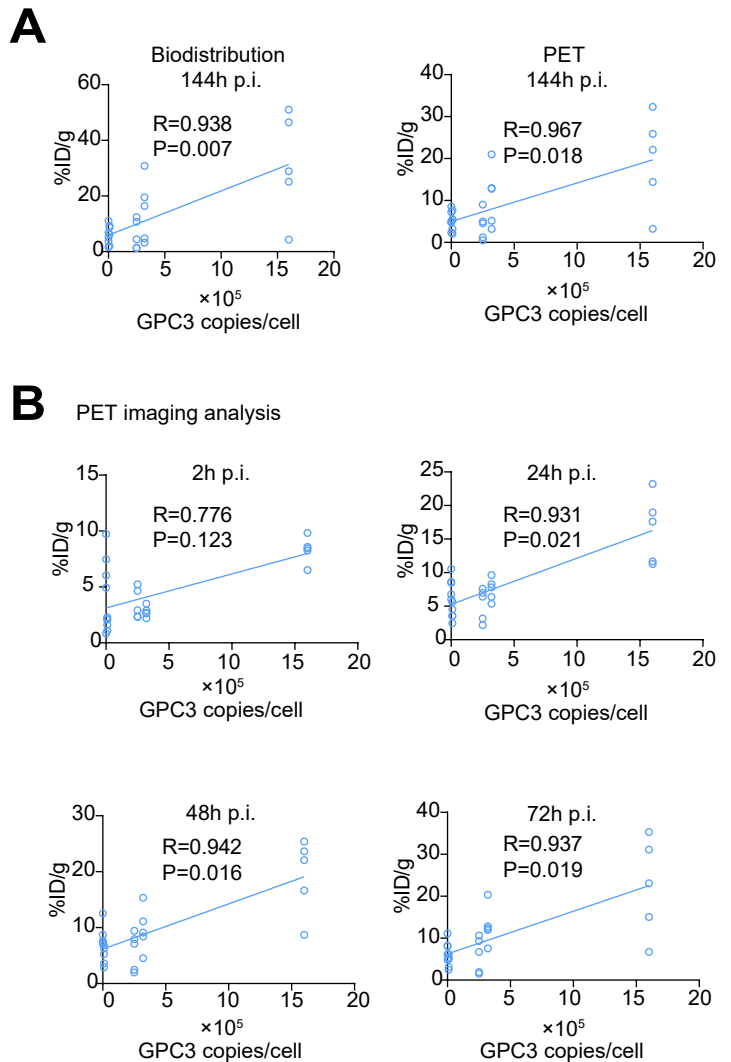

**Figure 4: Cell membrane GPC3 copy number corresponds to quantitative immunoPET imaging and ex vivo biodistribution.** Correlation between %ID/g estimates derived from biodistribution (A, left), or PET (A, right) and GPC3 copies per cell at 144h post tracer injection (n=5). (B) PET correlation between %ID/g estimates and GPC3 copies per cell at 2, 24, 48, and 72h post tracer injection (n=5). R and P values calculated by two-tailed Pearson's correlation.

### stoichiometrically detects GPC3-expressing tumors in vivo and ex vivo

Serum stability studies demonstrated that both conjugates



## ARTICLES PREPRINT

were radiochemically stable (>95% intact) out to 168 h. The blood half-life of [<sup>89</sup>Zr]Zr-DFO-TAB-H14 was estimated to be 8.00 hours (95% CI 5.73-11.11,  $R^2 = 0.835$ )(**Figure S1D**), representing a favorable pharmacokinetic profile for a full-length antibody, which, as a class, typically have blood half-lives ranging from days to weeks (19).

We observed specific *in vivo* GPC3 engagement and retention in xenografted tumors via PET/CT by [<sup>89</sup>Zr]Zr-DFO-TAB-H14 as early as 24 h, persisting to at least 144 h p.i (**Figure 2**). This trend was observed across G1, HepG2, Hep3B, tumors, however, Huh7 tumor signal was not significantly higher than the A431 control tumors.

Quantitation of PET images by analyzing regions of interest demonstrates about a 3-fold ( $22.3 \pm 5.21$  versus  $6.92 \pm 0.96$ ,  $n=5$ ) higher tumor ( $p < 0.05$ ) %ID/g values in G1 compared to A431 xenografts groups at 72 h p.i. Similarly, [<sup>89</sup>Zr]Zr-DFO-TAB-H14 tracer uptake in HepG2 demonstrates 4-fold higher tumor uptake %ID/g values compared to [<sup>89</sup>Zr]Zr-DFO-IgG1 control groups ( $13.0 \pm 2.07$ ;  $3.07 \pm 0.61$  %ID/g,  $n=5$ ,  $p < 0.05$ ) at 72h p.i. However, in Hep3B tumors, %ID/g values were not significantly higher in the [<sup>89</sup>Zr]Zr-DFO-TAB-H14 group compared to IgG1 controls ( $6.03 \pm 1.86$ ,  $n=5$ ;  $3.70 \pm 0.27$ ,  $n=5$ ,  $p = 0.25$ ) at 72h p.i. Similarly, Huh7 tumor-bearing mice at 72 h p.i. did not show significant [<sup>89</sup>Zr]Zr-DFO-TAB-H14 tumor %ID/g values compared to the control group ( $4.44 \pm 0.70$ ;  $3.09 \pm 0.71$ ,  $n=5$ ,  $p = 0.23$ ). These data suggest that there is a threshold limit of GPC3 expression below which immunoPET is not sufficiently sensitive.

*Ex vivo* biodistribution and quantitation showed tumor %ID/g values of  $31.2 \pm 8.34$  compared to  $7.03 \pm 1.84$  ( $n=5$ ,  $p < 0.05$ ) at 144 h post-injection in G1 and A431 xenografts, respectively (**Figure 3A, S2A,B**). Animals bearing G1 tumors injected with [<sup>89</sup>Zr]Zr-DFO-TAB-IgG1 showed %ID/g of  $7.03 \pm 4.11$ . *Ex vivo* biodistribution quantitation of HepG2 bearing mice showed significant tracer accumulation in tumors ( $15.0 \pm 5.08$  %ID/g,  $n=5$ ,  $p < 0.05$ ) compared to control ( $3.42 \pm 1.37$  %ID/g,  $n=5$ ) at 144 h post injection. Notably, Hep3B ( $6.04 \pm 2.34$  %ID/g,  $n=5$ ,  $p = 0.20$ ) and Huh7 ( $6.53 \pm 1.67$  %ID/g,  $n=5$ ,  $p = 0.21$ ) tumors did not exhibit higher specific tracer accumulation compared with control ( $2.72 \pm 0.93$  %ID/g,  $n=5$ ) at the same time point. Off-target accumulation was primarily observed in the spleen, liver, and bone, which is a common site for free Zr-89 accumulation (**Figure S2A,B**). That quantitative *ex vivo* biodistribution data align with the *in vivo* imaging results further confirms good immunoPET tracer target engagement *in vivo*.

Given that our agent would need to discern GPC3-expressing tumor in liver, the tumor:liver ratios were favorable for G1 and HepG2 (**Figure 3B**), the with values  $10.07 \pm 2.54$  and  $2.11 \pm 0.79$  ( $n=5$ ,  $p < 0.05$ ) at 144 h post-injection in G1 and A431 xenografts respectively (**Table 1**). Quantitation of autoradiography in tumor tissue showed heterogeneous distribution concordant with [<sup>89</sup>Zr]Zr-DFO-TAB-H14 PET

imaging results (**Figure 3C, Table 1**).

To further assess the efficacy of our tracer to serve as a sensor for GPC3 *in vivo*, we compared the estimated %ID/g derived from PET imaging and from quantitative biodistribution to the known GPC3 copy number on the surface of cell lines used in this study(34). This analysis confirmed a statistically significant correlation between both biodistribution- and PET-determined %ID/g of tumors, at 24h (PET:  $R=0.931$ ,  $P=0.21$ ) and persisting through 144h (biodistribution:  $R=0.938$ ,  $P=0.007$ ; PET:  $R=0.967$ ,  $P=0.018$ ) post injection (**Figure 4A, B**).

## DISCUSSION

While laboratory tests and conventional imaging modalities facilitate HCC diagnosis, surveillance and response to treatments, effective functional imaging for hepatocellular carcinoma remains a challenge. Since only about half of HCCs take up <sup>18</sup>FDG PET, the standard functional tracer, immunoPET may serve as an informative imaging biomarker in such circumstances and could allow more timely local or systemic interventions (5).

GPC3 is a known marker of HCC and several GPC3-directed agents, including vaccines, monoclonal antibodies, bispecific T-cell engagers, single-domain antibody conjugates, targeted peptides, and chimeric antigen receptor T-cells (26, 28, 30, 35-39). Accordingly, identifying tumors that express GPC3 with immunoPET could help better enrich for populations that may most benefit from these treatments (32). Carrasquillo *et al.* successfully performed quantitative PET imaging using I-124 labeled codrituzumab, a GPC3-selective humanized IgG1, to image patients with HCC receiving sorafenib. Authors confirmed good tumor uptake with good signal-to-noise as early as 24h post tracer injection. Notably, authors also reported that using Zr-89 instead of I-124 would have provided better resolution due to the shorter positron range of the former(40).

Our immunoPET agent, the first humanized Zr-89-based tracer targeting GPC3, has good affinity, exhibits favorable pharmacokinetics, and is stoichiometric in its target binding *in vivo*. Imaging results were corroborated with quantitative *ex vivo* biodistribution, and autoradiographic evaluation, which further confirmed this tracer's ability to serve as an *in vivo* GPC3 sensor. Importantly, off-target tracer accumulation was noted in the spleen liver, and bone—a known sink for free Zr-89. However, G1 and HepG2 both exhibited tumor-liver-ratios that would provide adequate signal-to-noise in the orthotopic setting, a prerequisite for clinical translation (41). Studies evaluating the performance of our tracer in this context are planned.

In addition to using TAB-H14 as a scaffold for diagnostic purposes, one could envision the design and engineering of a therapeutic agent to deliver cytotoxic drugs or radioisotopes. Such a construct appears necessary given that previous studies have shown that codrituzumab, humanized full-length monoclonal antibody to GPC3 (a.k.a. GC33), did not



significantly improve overall survival or progression free survival of patients with advanced HCC in a randomized phase II trial (42). These findings suggest that antibody directed cellular cytotoxicity, the mechanism by which most antibodies exert their therapeutic effect in vivo, is insufficient to affect therapeutic outcomes in patients. The theranostic utility of our agent would allow improved selection for not only targeted radioligand therapy, but also any type of GPC3-directed therapy.

In conclusion, we demonstrate that TAB-H14 immunoPET agent can stoichiometrically report GPC3 expression in several models of human liver cancer in vivo, opening the potential for this theranostic agent to facilitate molecularly targeted therapies in HCC.

## ACKNOWLEDGEMENTS

Authors thank Drs. Grzegorz Piszczek and Di Wu of the NHLBI Biophysics Core for assistance provided.. We also thank Drs. Thorkell Andresson, Maura O'Neill and Ben Orsburn of the NCI CCR Mass Spectrometry Core, as well as the NIDCR Imaging Core for microscopy assistance. We are grateful to Drs. Janet Eary and Gary L. Griffiths for critical review of earlier versions of this manuscript.

## FUNDING INFORMATION

This research was supported by the Intramural Research Program of the NIH, NCI, Center for Cancer Research (ZIA BC 011800; ZIA BC 010891). OJK was funded by PerkinElmer, Inc. as an adjunct.

## REFERENCES

1. H. K. Weir, T. D. Thompson, A. Soman, B. Moller, S. Leadbetter, The past, present, and future of cancer incidence in the United States: 1975 through 2020. *Cancer* **121**, 1827-1837 (2015).
2. N. A. Howlander N, Krapcho M, Miller D, Brest A, Yu M, Ruhl J, Tatalovich Z, Mariotto A, Lewis DR, Chen HS, Feuer EJ, Cronin KA (eds). , SEER Cancer Statistics Review, 1975-2016, National Cancer Institute. Bethesda, MD, [https://seer.cancer.gov/csr/1975\\_2016/](https://seer.cancer.gov/csr/1975_2016/), based on November 2018 SEER data submission, posted to the SEER web site, April 2019.
3. N. Ohri *et al.*, Local Control After Stereotactic Body Radiation Therapy for Liver Tumors. *Int J Radiat Oncol Biol Phys*, (2018).
4. J. A. Marrero *et al.*, Diagnosis, Staging, and Management of Hepatocellular Carcinoma: 2018 Practice Guidance by the American Association for the Study of Liver Diseases. *Hepatology* **68**, 723-750 (2018).
5. M. A. Khan *et al.*, Positron emission tomography scanning in the evaluation of hepatocellular carcinoma. *J Hepatol* **32**, 792-797 (2000).
6. F. E. Escorcía *et al.*, Tumor-Specific Zr-89 Immuno-PET Imaging in a Human Bladder Cancer Model. *Molecular imaging and biology* **20**, 808-815 (2018).
7. X. Yang *et al.*, Imaging of hepatocellular carcinoma patient-derived xenografts using (89)Zr-labeled anti-glypican-3 monoclonal antibody. *Biomaterials* **35**, 6964-6971 (2014).
8. E. M. Jagoda *et al.*, Immuno-PET Imaging of the Programmed Cell Death-1 Ligand (PD-L1) Using a Zirconium-89 Labeled Therapeutic Antibody, Avelumab. *Mol Imaging* **18**, 1536012119829986 (2019).
9. N. Sato *et al.*, (89)Zr-Oxine Complex PET Cell Imaging in Monitoring Cell-based Therapies. *Radiology* **275**, 490-500 (2015).
10. J. P. Holland *et al.*, Annotating MYC status with 89Zr-transferrin imaging. *Nat Med* **18**, 1586-1591 (2012).
11. F. E. Escorcía *et al.*, ImmunoPET Predicts Response to Met-targeted Radioligand Therapy in Models of Pancreatic Cancer Resistant to Met Kinase Inhibitors. *Theranostics* **10**, 151-165 (2020).
12. G. Gebhart *et al.*, Molecular imaging as a tool to investigate heterogeneity of advanced HER2-positive breast cancer and to predict patient outcome under trastuzumab emtansine (T-DM1): the ZEPHIR trial. *Ann Oncol* **27**, 619-624 (2016).
13. E. C. Dijkers *et al.*, Biodistribution of 89Zr-trastuzumab and PET imaging of HER2-positive lesions in patients with metastatic breast cancer. *Clin Pharmacol Ther* **87**, 586-592 (2010).
14. J. R. Osborne *et al.*, A prospective pilot study of (89)Zr-J591/prostate specific membrane antigen positron emission tomography in men with localized prostate cancer undergoing radical prostatectomy. *J Urol* **191**, 1439-1445 (2014).
15. G. A. Ulaner *et al.*, Detection of HER2-Positive Metastases in Patients with HER2-Negative Primary Breast Cancer Using 89Zr-Trastuzumab PET/CT. *J Nucl Med* **57**, 1523-1528 (2016).
16. N. Pandit-Taskar *et al.*, (89)Zr-huJ591 immuno-PET imaging in patients with advanced metastatic prostate cancer. *Eur J Nucl Med Mol Imaging* **41**, 2093-2105 (2014).
17. L. Lindenberg *et al.*, Dosimetry and first human experience with (89)Zr-panitumumab. *Am J Nucl Med Mol Imaging* **7**, 195-203 (2017).
18. P. M. Smith-Jones, D. Solit, F. Afroze, N. Rosen, S. M. Larson, Early tumor response to Hsp90 therapy using HER2 PET: comparison with 18F-FDG PET. *J Nucl Med* **47**, 793-796 (2006).
19. J. T. Ryman, B. Meibohm, Pharmacokinetics of Monoclonal Antibodies. *CPT: pharmacometrics & systems pharmacology* **6**, 576-588 (2017).
20. G. Pilia *et al.*, Mutations in GPC3, a glypican gene, cause the Simpson-Golabi-Behmel overgrowth syndrome. *Nat Genet* **12**, 241-247 (1996).
21. M. Capurro *et al.*, Glypican-3: a novel serum and histochemical marker for hepatocellular carcinoma. *Gastroenterology* **125**, 89-97 (2003).
22. K. Yorita *et al.*, Prognostic significance of circumferential cell surface immunoreactivity of glypican-3 in hepatocellular carcinoma. *Liver Int* **31**, 120-131 (2011).
23. H. L. Wang *et al.*, Glypican-3 as a useful diagnostic marker that distinguishes hepatocellular carcinoma from benign hepatocellular mass lesions. *Archives of pathology & laboratory medicine* **132**, 1723-1728 (2008).
24. H. C. Hsu, W. Cheng, P. L. Lai, Cloning and expression of a developmentally regulated transcript MXR7 in hepatocellular carcinoma: biological significance and temporospatial distribution. *Cancer Res* **57**, 5179-5184 (1997).
25. A. X. Zhu *et al.*, First-in-man phase I study of GC33, a novel recombinant humanized antibody against glypican-3, in patients with advanced hepatocellular carcinoma. *Clin Cancer Res* **19**, 920-928 (2013).
26. Y.-F. Zhang, M. Ho, Humanization of high-affinity antibodies targeting glypican-3 in hepatocellular carcinoma. *Scientific Reports* **6**, 33878 (2016).
27. H. Hanaoka *et al.*, Glypican-3 targeted human heavy chain antibody as a drug carrier for hepatocellular carcinoma therapy. *Mol Pharm* **12**, 2151-2157 (2015).
28. J. G. Sham *et al.*, Glypican-3-targeting F(ab')<sub>2</sub> for 89Zr PET of hepatocellular carcinoma. *J Nucl Med* **55**, 2032-2037 (2014).
29. Y. F. Zhang, M. Ho, Humanization of high-affinity antibodies targeting glypican-3 in hepatocellular carcinoma. *Sci Rep* **6**, 33878 (2016).
30. Y. Sawada *et al.*, Phase II study of the GPC3-derived peptide vaccine as an adjuvant therapy for hepatocellular carcinoma patients. *Oncoimmunology* **5**, e1129483 (2016).
31. Y. Phung, W. Gao, Y. G. Man, S. Nagata, M. Ho, High-affinity monoclonal antibodies to cell surface tumor antigen glypican-3 generated through a combination of peptide immunization and flow cytometry screening. *MAbs* **4**, 592-599 (2012).
32. R. M. Berman *et al.*, In Vitro Performance of Published Glypican 3-Targeting Peptides TJ12P1 and L5 Indicates Lack of Specificity and Potency. *Cancer Biother Radiopharm* **34**, 498-503 (2019).
33. C. A. Schneider, W. S. Rasband, K. W. Eliceiri, NIH Image to ImageJ: 25 years of image analysis. *Nature methods* **9**, 671-675 (2012).
34. W. Gao *et al.*, Immunotoxin targeting glypican-3 regresses liver cancer via dual inhibition of Wnt signalling and protein synthesis. *Nat Commun* **6**, 6536 (2015).

## ARTICLES PREPRINT

35. T. Ishiguro *et al.*, Anti-glypican 3 antibody as a potential antitumor agent for human liver cancer. *Cancer Res* **68**, 9832-9838 (2008).
36. Y. Phung, W. Gao, Y.-G. Man, S. Nagata, M. Ho, High-affinity monoclonal antibodies to cell surface tumor antigen glypican-3 generated through a combination of peptide immunization and flow cytometry screening. *mAbs* **4**, 592-599 (2012).
37. T. Ishiguro *et al.*, An anti-glypican 3/CD3 bispecific T cell–redirecting antibody for treatment of solid tumors. **9**, eaal4291 (2017).
38. D. H. M. Steffin *et al.*, A phase I clinical trial using armored GPC3 CAR T cells for children with relapsed/refractory liver tumors. *Journal of Clinical Oncology* **37**, TPS2647-TPS2647 (2019).
39. B. D. Fleming *et al.*, The engineered anti-GPC3 immunotoxin, HN3-ABD-T20, produces regression in mouse liver cancer xenografts via prolonged serum retention. *Hepatology*, (2019).
40. J. A. Carrasquillo *et al.*, I-124 codrituzumab imaging and biodistribution in patients with hepatocellular carcinoma. *EJNMMI research* **8**, 20 (2018).
41. M. Cataldi, C. Vigliotti, T. Mosca, M. Cammarota, D. Capone, Emerging Role of the Spleen in the Pharmacokinetics of Monoclonal Antibodies, Nanoparticles and Exosomes. *International journal of molecular sciences* **18**, (2017).
42. G. K. Abou-Alfa *et al.*, Randomized phase II placebo controlled study of codrituzumab in previously treated patients with advanced hepatocellular carcinoma. *J Hepatol* **65**, 289-295 (2016).

# SUPPLEMENTAL MATERIALS

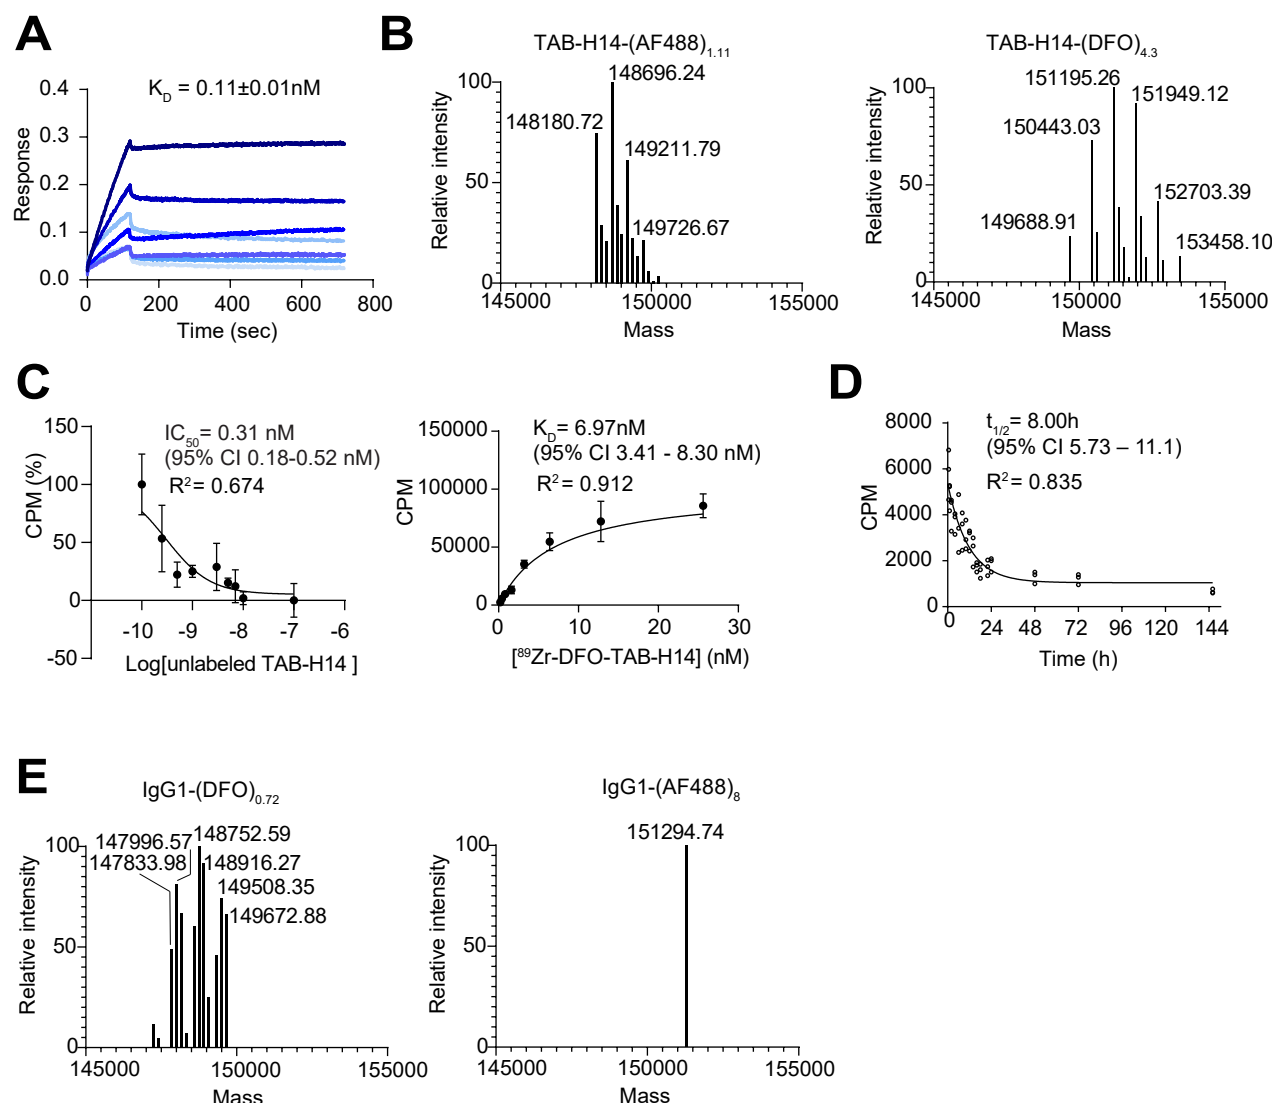

**Figure S1: TAB-H14 exhibits high affinity for GPC3 and favorable pharmacokinetic profile.** (A) Bi-layer interferometry assessment of binding affinity of TAB-H14 (at 16, 8, 4, 2, 1, 0.5, 0.25 nM) for GPC3 (125 nM) showing  $K_D = 0.11 \pm 0.01 \text{ nM}$ . (B) Mass spectrometry spectra of AF488 (left; MW: 516 Da) and DFO (right; MW 754 Da) TAB-H14 conjugates, showing a weighted average of 1.11 (0-3) and 4.3 (2-7) moieties per antibody (MW: 148,190 Da), respectively. (C) Competition and saturation cell binding studies using  $[^{89}\text{Zr}]\text{Zr-DFO-TAB-H14}$  in HepG2 confirmed favorable binding to GPC3. (D)  $[^{89}\text{Zr}]\text{Zr-DFO-TAB-H14}$  blood half-life estimate in non-tumor bearing athymic mice was 8h. The stability of tracer was determined by incubation in human serum at 37°C and assessing the percent of total activity remaining at the origin via iTLC. (E) Mass spectrometry spectra of IgG1-DFO (left) and IgG1-AF488 (right) demonstrating a weighted average of 0.72 (0-3) and 8 DFO and AF488 moieties, respectively.



# ARTICLES PREPRINT

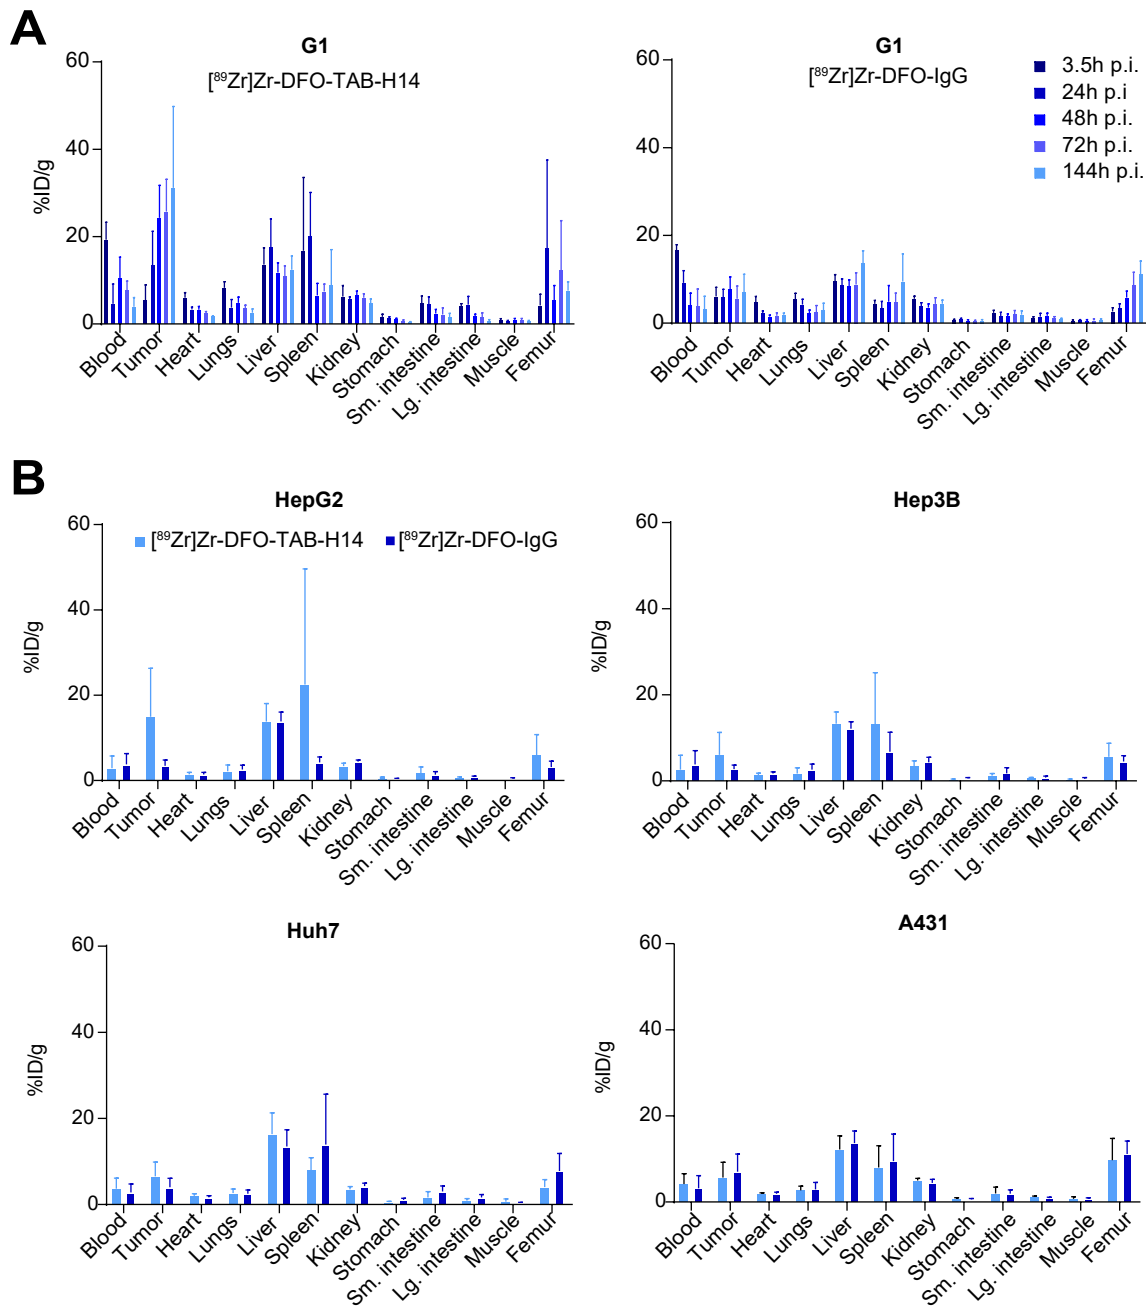

**Figure S2: Complete quantitative biodistribution assessment of immunoPET tracer.** Complete twelve tissue ex vivo biodistribution of animals engrafted with (A) G1 at 3.5, 24, 48, 72, and 144h post injection (p.i.) with either  $^{89}\text{Zr}$ Zr-DFO-TAB-H14 or  $^{89}\text{Zr}$ Zr-DFO-IgG1 control (n=5 per group, per time point). (B) Ex vivo biodistribution of animals engrafted with HepG2, Hep3B, Huh7, and A431 tumors at 144h (p.i.) (n=5 per group).
